# Supplementary material
Source: PubMed Central journal article supplement (PMC6506885)
Supplement: jama-321-1693-s004.pdf [file jama-321-1693-s004.pdf]

## Supplementary Online Content

Wise RA, Chapman KR, Scirica BJ, et al. Effect of acclidinium bromide on major cardiovascular events and exacerbations in high-risk patients with chronic obstructive pulmonary disease: the ASCENT-COPD randomized clinical trial [published May 7, 2019]. *JAMA*. doi:10.1001/jama.2019.4973

### Data Sharing Statement

#### Data

**Data available:** No

#### Additional Information

**Explanation for why data not available:** Data underlying the findings described in this manuscript may be obtained in accordance with AstraZeneca's data-sharing policy described at <https://astrazenecagrouptrials.pharmacm.com/ST/Submission/Disclosure>.
